# Supplementary material for: Using social media to promote academic research: Identifying the benefits of twitter for sharing academic work
Source: PLOS journal article supplement (doi:10.1371/journal.pone.0229446), 2020-04-06
Supplement: S12 (10.1371/journal.pone.0229446.s012) [file journal.pone.0229446.s012]

## Klar, Samara M - (klar)

---

**From:** Søren Serritzlew <soren@ps.au.dk>  
**Sent:** Wednesday, December 4, 2019 6:06 AM  
**To:** Klar, Samara M - (klar)  
**Subject:** Re: Seeking permission to include your twitter handle in a table

Dear Samara,

Thank you for reaching out to get consent. You are welcome to include my twitter-handle.

Best,

Søren

---

**Fra:** "Klar, Samara M - (klar)" <klar@email.arizona.edu>  
**Dato:** tirsdag den 3. december 2019 kl. 21.27  
**Til:** Søren Serritzlew <soren@ps.au.dk>  
**Emne:** Seeking permission to include your twitter handle in a table

Dear Dr. Serritzlew,

I'm writing to ask for your consent to include your twitter handle in an article I am coauthoring (along with Yanna Krupnikov, John Ryan, Kathleen Searles, and Yotam Shmargad).

In our article, we analyze Twitter activity among academics. We are particularly interested in exploring whether journal articles that are shared on twitter tend to be cited more than those that are not. We carry out our analyses in a number of ways and we do find modest effects: that is, articles that are shared on twitter appear to be cited more often – even a year later – than similar articles that are not. We also find no discrepancies by gender.

Our dataset includes publicly available Twitter handles of academics who shared peer-reviewed articles during the time-period we examined. Your handle is among them. According to the IRB, these handles are publicly available and thus do not require consent to publish. However, we still wanted to reach out to obtain your consent for including your Twitter handle in a table of academics who post articles on Twitter. This article is currently R+R'ed at Plos ONE and, should it be accepted, your handle would be included in a table in the article.

Please let me know if you are okay with this! I am also happy to answer any questions or concerns you might have!

Best,  
Samara

\*\*

Samara Klar, Ph.D.  
Associate Professor  
School of Government & Public Policy  
University of Arizona  
Tucson, Arizona

Call/Text: 262-372-6726  
Email: [klar@email.arizona.edu](mailto:klar@email.arizona.edu)

Web: [www.samaraklar.com](http://www.samaraklar.com)
